# Supplementary material for: Rapamycin downregulates α-klotho in the kidneys of female rats with normal and reduced renal function
Source: PubMed Central journal article supplement (PMC10684065; doi:10.1371/journal.pone.0294791), 2023-11-28

### A) Experiments with Normal P diet

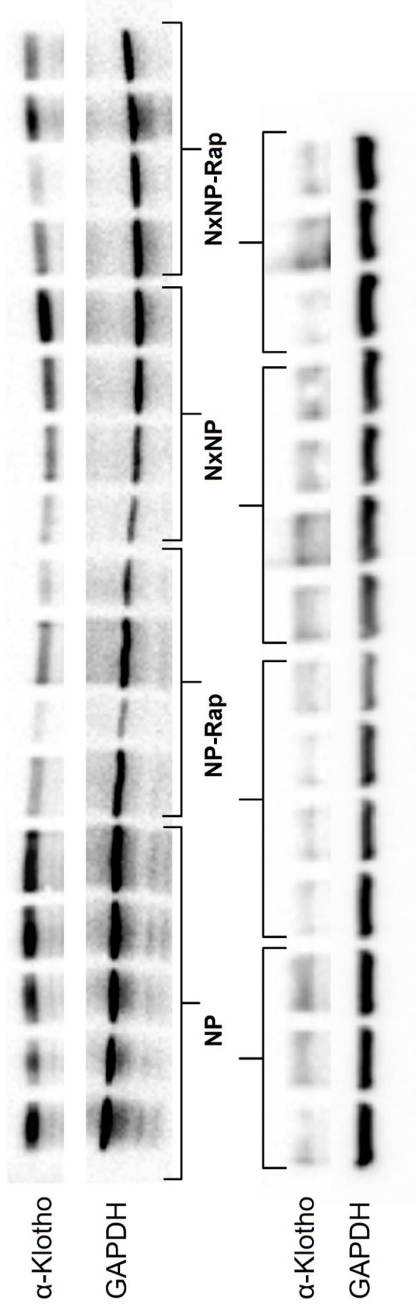

### B) Experiments with Low P diet

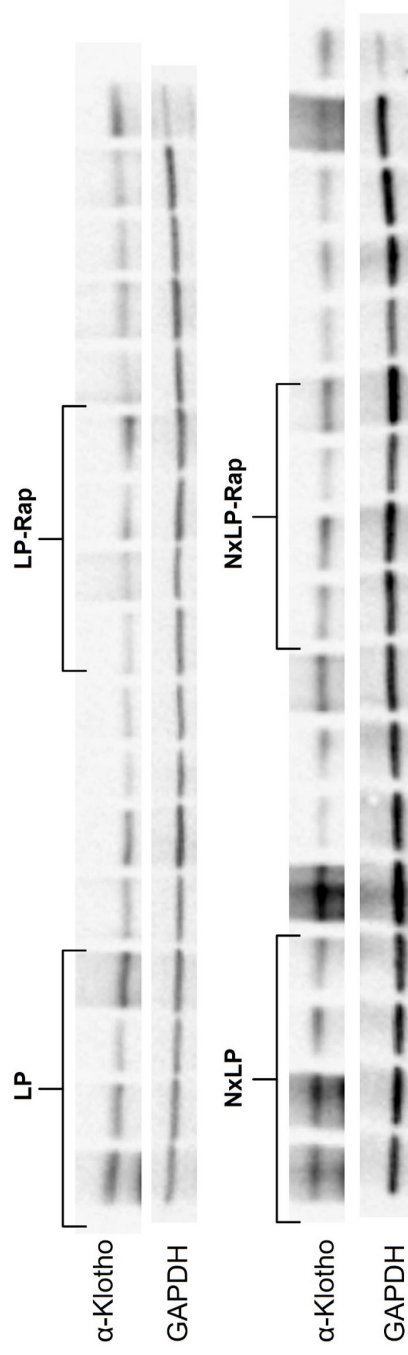

Supplement: pone.0294791.s003.pdf [file pone.0294791.s003.pdf]
